# Supplementary material for: A feasibility study to assess the recruitment and retention of pregnant patients who regularly use cannabis
Source: Springer Nature journal article supplement (doi:10.1186/s13104-024-06826-4), 2024-06-25
Supplement: MOESM2 [file 13104_2024_6826_MOESM2_ESM.pdf]

# CLM-Maternal and Infant Health, Second & Third Trimester Follow-up

---

Start of Block: Study ID

Page Break

---

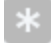

Q1 Please enter your study ID.

---

End of Block: Study ID

---

Start of Block: General Health & Pregnancy

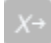

Q2 I have some general questions about your health. Since your **LAST** interview, would you say your **health in general** is.....

- Excellent (1)
- Very good (2)
- Good (3)
- Fair (4)
- Poor (5)
- I do not know (6)
- I do not wish to answer this question (7)

---

Page Break

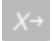

Q3 The next set of questions are about recent health during the **past 30 days**.

Thinking about your **physical health**, which includes physical illness and injury, for how many days during the past 30 days was your physical health **not good**?

▼ 0 days (1) ... I do not wish to answer this question (33)

---

Page Break

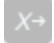

Q4 Moderate-intensity sports, fitness, or recreational activities cause small increases in breathing or heart rate and is done for at least 10 minutes continuously.

Since your **LAST** interview, in a typical week, on how many days do you do moderate-intensity sports, fitness or recreational activities?

▼ 0 (1) ... I do not wish to answer this question (10)

---

Page Break



Q5 Now thinking about your **mental health**, which includes stress, depression, and problems with emotions, for how many days during the past 30 days was your mental health **not good**?

▼ 0 days (1) ... I do not wish to answer this question (33)

---

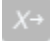

Q6 During the **past 30 days**, for about how many days have you felt **worried, tense, or anxious**?

▼ 0 days (1) ... I do not wish to answer this question (33)

---

Page Break

---

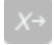

Q7 During the past 30 days, for about how many days did poor physical or mental health keep you from doing your usual activities, such as self-care, work, school or recreation?

▼ 0 days (1) ... I do not wish to answer this question (33)

---

Page Break



Q8 Did you have a **head cold or chest cold** that started during the **past 30 days**?

- Yes (1)
- No (2)
- I do not know (3)
- I do not wish to answer this question (4)

---

*Display This Question:*

*If Did you have a head cold or chest cold that started during the past 30 days? = Yes*

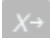

Q9 During the **past 30 days**, for about how many **days** did you have a **head cold or chest cold**?

▼ 1 day (1) ... I do not wish to answer this question (32)

---

Page Break

X→

Q10 Did you have **flu, pneumonia, or ear infections** that started during the **past 30 days**?

- Yes (1)
- No (2)
- I do not know (3)
- I do not wish to answer this question (4)

---

*Display This Question:*

*If Did you have flu, pneumonia, or ear infections that started during the past 30 days? = Yes*

X→

Q11 During the **past 30 days**, for about how many **days** did you have flu, pneumonia, or ear infections?

▼ 1 day (1) ... I do not wish to answer this question (32)

---

Page Break



Q12 How many **months** pregnant are you now?

- 4 (1)
  - 5 (2)
  - 6 (3)
  - 7 (4)
  - 8 (5)
  - 9 (6)
  - Other. Please specify (7)
- 

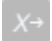

Q13 About how much do you weigh **now**?

- Weight in pounds (1) \_\_\_\_\_
  - Weight in Kilograms (2) \_\_\_\_\_
  - I do not know (3)
  - I do not wish to answer this question (4)
- 

Page Break \_\_\_\_\_

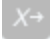

Q14 During the **past 30 days**, how many times a week did you take a multivitamin, prenatal vitamin or a folic acid vitamin?

- I didn't take a multivitamin, prenatal vitamin, or folic acid vitamin at all (1)
- 1 to 3 times a week (2)
- 4 to 6 times a week (3)
- Every day of the week (4)
- I do not know (5)
- I do not wish to answer this question (6)

---

Page Break

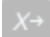

Q15

Since your **LAST** interview, has a physician or healthcare professional told you that you have gestational diabetes, or pregnancy diabetes?

- Yes (1)
  - No (2)
  - I do not know (3)
  - I do not wish to answer this question (4)
- 

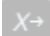

Q16 Since your **LAST** interview, has a physician or healthcare professional told you that you have high blood pressure during pregnancy, or preeclampsia?

- Yes (1)
- No (2)
- I do not know (3)
- I do not wish to answer this question (4)

End of Block: General Health & Pregnancy

---

Start of Block: Morning Sickness

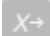

Q17 Since your **LAST** interview, have you experienced nausea during your pregnancy?

- Yes (1)
- No (2)
- I do not know (3)
- I do not wish to answer this question (4)

---

*Display This Question:*

*If Since your LAST interview, have you experienced nausea during your pregnancy? = Yes*

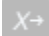

Q18 On average, in a day, for how long do you feel nauseated or sick to your stomach?

- Not at all (1)
- 1 hour or less (2)
- 2 tot 3 hours (3)
- 4 to 6 hours (4)
- More than 6 hours (5)
- I do not know (6)
- I do not wish to answer this question (7)

---

*Display This Question:*

*If Since your LAST interview, have you experienced nausea during your pregnancy? = Yes*

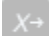

Q19 Because of your nausea, have you been told by a doctor to take prescribed medicine?

- Yes (1)
  - No (2)
  - I do not know (3)
  - I do not wish to answer this question (4)
- 

X→

Q20 Since your **LAST** interview, have you experienced vomiting during your pregnancy?

- Yes (1)
  - No (2)
  - I do not know (3)
  - I do not wish to answer this question (4)
- 

*Display This Question:*

*If Since your LAST interview, have you experienced vomiting during your pregnancy? = Yes*

X→

Q21 On average, in a day, how many times do you vomit or throw up?

- None (1)
- 1 to 2 times (2)
- 3 to 4 times (3)
- 5 to 6 times (4)
- 7 or more times (5)
- I do not know (6)
- I do not wish to answer this question (7)

---

*Display This Question:*

*If Since your LAST interview, have you experienced vomiting during your pregnancy? = Yes*

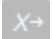

Q22 Because of your vomiting, have you been told by a doctor to take prescribed medicine?

- Yes (1)
- No (2)
- I do not know (3)
- I do not wish to answer this question (4)

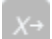

Q23 Since your **LAST** interview, have you experienced retching or dry heaves without bringing anything up?

- Yes (1)
- No (2)
- I do not know (3)
- I do not wish to answer this question (4)

---

*Display This Question:*

*If Since your LAST interview, have you experienced retching or dry heaves without bringing anything... = Yes*

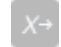

Q24 On average, in a day, how many times do you have retching or dry heaves without bringing anything up?

- None (1)
- 1 to 2 times (2)
- 3 to 4 times (3)
- 5 to 6 times (4)
- 7 or more times (5)
- I do not know (6)
- I do not wish to answer this question (7)

---

*Display This Question:*

*If Since your LAST interview, have you experienced retching or dry heaves without bringing anything... = Yes*

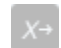

Q25 Because of your retching or dry heaves, have you been told by a doctor to take prescribed medicine?

- Yes (1)
- No (2)
- I do not know (3)
- I do not wish to answer this question (4)

End of Block: Morning Sickness

---

Start of Block: Drug use

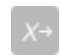

Q26 Since your **LAST** interview, have you used or taken medication for which a **prescription** is needed? If yes, please list the prescription medications you have taken since your **LAST** interview.

- Yes (1) \_\_\_\_\_
- No (2)
- I do not know (3)
- I do not wish to answer this question (4)

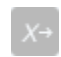

Q27 Since your **LAST** interview, have you used or taken **over-the-counter medication**, for which a prescription was NOT needed? If yes, please list the **over-the-counter medications** you have used or taken since your **LAST** interview.

- Yes (1) \_\_\_\_\_
- No (2)
- I do not know (3)
- I do not wish to answer this question (4)

---

*Display This Question:*

*If Since your LAST interview, have you used or taken medication for which a prescription is needed?... = Yes*

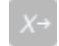

Q28 In the **past 30 days**, have you used or taken medication for which a **prescription** is needed? If yes, please list the prescription medications you have used or taken in the **past 30 days**.

- Yes (1) \_\_\_\_\_
- No (2)
- I do not know (3)
- I do not wish to answer this question (4)

---

*Display This Question:*

*If Since your LAST interview, have you used or taken over-the-counter medication, for which a prescr... = Yes*

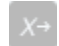

Q29 In the **past 30 days**, have you used or taken **over-the-counter medication**, for which a prescription was NOT needed? If yes, please list the **over-the-counter medications** you have used or taken in the **past 30 days**.

Yes (1) \_\_\_\_\_

No (2)

I do not know (3)

I do not wish to answer this question (4)

---

Page Break

X→

Q30 These questions are about the use of tobacco products. The first questions are about cigarettes only.

Since your **LAST** interview, have you smoked part or all of a **cigarette**?

- Yes (1)
- No (2)
- I do not know (3)
- I do not wish to answer this question (4)

*Skip To: Q33 If These questions are about the use of tobacco products. The first questions are about cigarettes o... = No*

*Skip To: Q33 If These questions are about the use of tobacco products. The first questions are about cigarettes o... = I do not know*

*Skip To: Q33 If These questions are about the use of tobacco products. The first questions are about cigarettes o... = I do not wish to answer this question*

---

X→

Q31 During the past 30 days, on how many days did you **smoke part or all of a cigarette**?

▼ 0 days (1) ... I do not wish to answer this question (33)

*Skip To: Q33 If During the past 30 days, on how many days did you smoke part or all of a cigarette? = 0 days*

---

X→

Q32 On the days you **smoked cigarettes** during the **past 30 days**, **how many** cigarettes did you smoke **per day**, on average?

- Less than one cigarette per day (1)
  - 1 cigarette per day (2)
  - 2 to 5 cigarettes per day (3)
  - 6 to 15 cigarettes per day (about 1/2 pack) (4)
  - 16 to 25 cigarettes per day (about 1 pack) (5)
  - 26 to 35 cigarettes per day (about 1 1/2 packs) (6)
  - More than 35 cigarettes per day (about 2 packs or more) (7)
  - I do not know (8)
  - I do not wish to answer this question (9)
- 

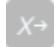

Q33 The following questions ask about using **smokeless tobacco**, such as snuff, dip, chewing tobacco, or snus.

Since your LAST interview, have you used “smokeless” tobacco, even once?

- Yes (1)
  - No (2)
  - I do not know (3)
  - I do not wish to answer this question (4)
-

*Display This Question:*

*If The following questions ask about using smokeless tobacco, such as snuff, dip, chewing tobacco, o... = Yes*

X→

Q34 During the past 30 days, on how many days did you use smokeless tobacco?

▼ 0 days (1) ... I do not wish to answer this question (33)

X→

Q35 The following questions ask about smoking other tobacco products such as pipes, cigars, little cigars or cigarillos, water pipes, hookahs, or e-cigarettes. Since your LAST interview, have you **ever smoked other tobacco products**, even once?

- Yes (1)
- No (2)
- I do not know (3)
- I do not wish to answer this question (4)

*Display This Question:*

*If The following questions ask about smoking other tobacco products such as pipes, cigars, little ci... = Yes*

X→

Q36 During the past 30 days, on how many days did you **smoke** other tobacco products such as pipes, cigars, little cigars or cigarillos, water pipes, hookahs, or e-cigarettes?

▼ 0 days (1) ... I do not wish to answer this question (33)

Page Break

X→

Q37 Since your **LAST** interview, have you had a drink of any type of **alcoholic beverage**? Please do not include times when you only had a sip or two from a drink.

- Yes (1)
- No (2)
- I do not know (3)
- I do not wish to answer this question (4)

---

*Display This Question:*

*If Since your LAST interview, have you had a drink of any type of alcoholic beverage? Please do not... = Yes*

X→

Q38 During the **past 30 days**, on how many days did you **have a drink of any type of alcoholic beverage**?

▼ 0 days (1) ... I do not wish to answer this question (33)

---

Page Break

X→

Q39

Since your **LAST** interview, have you used **marijuana**?

- Yes (1)
- No (2)
- I do not know (3)
- I do not wish to answer this question (4)

*Skip To: Q45 If Since your LAST interview, have you used marijuana? = No*

*Skip To: Q45 If Since your LAST interview, have you used marijuana? = I do not know*

*Skip To: Q45 If Since your LAST interview, have you used marijuana? = I do not wish to answer this question*

X→

Q40

Was any of your **marijuana** use recommended by a doctor or other health care professional?

- Yes (1)
- No (2)
- I do not know (3)
- I do not wish to answer this question (4)

X→

Q41 During the **past 30 days**, on how many **days** have you used **marijuana** ?

▼ 0 days (1) ... I do not wish to answer this question (33)

*Skip To: Q45 If During the past 30 days, on how many days have you used marijuana ? = 0 days*

Display This Question:

*If During the past 30 days, on how many days have you used marijuana ? = I do not wish to answer this question*

*Or During the past 30 days, on how many days have you used marijuana ? = I do not know*

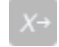

Q42 During the **past 30 days**, what is your **best estimate** of the number of **days you used marijuana**?

- 0 days (1)
- 1 or 4 days (2)
- 5 to 10 days (3)
- 11 to 18 days (4)
- 19 to 29 days (5)
- All 30 days (6)
- I do not know (7)
- I do not wish to answer this question (8)

*Skip To: Q45 If During the past 30 days, what is your best estimate of the number of days you used marijuana? = 0 days*

*Skip To: Q45 If During the past 30 days, what is your best estimate of the number of days you used marijuana? = I do not know*

*Skip To: Q45 If During the past 30 days, what is your best estimate of the number of days you used marijuana? = I do not wish to answer this question*

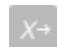

Q43 During the **past 30 days**, how did you use **marijuana**? Select all that apply

- Smoked a cigar with marijuana in it, such as a blunt (1)
  - Smoke it (such as a joint, bong, or pipe) (2)
  - Eat it (such as in brownies, cakes, cookies, or candy) (3)
  - Drink it (such as in tea, cola, or alcohol) (4)
  - Vaporize it (such as using a vape pen or e-cigarette-like vaporizer) (5)
  - Dab it (such as using butane hash oil, wax, or concentrates) (6)
  - Used it in some other way. Please specify. (7)
- 
- I do not know (8)
  - I do not wish to answer this question (9)

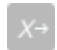

Q44 During the days that you used **marijuana** in the past 30 days, **how many** would you usually use **in a day**?

- 1 per day (1)
  - 2 per day (2)
  - 3-5 per day (3)
  - 6 or more per day (4)
  - I do not know (5)
  - I do not wish to answer this question (6)
-



X→

Q45 The next questions are about **cannabidiol (CBD) products** such as **CBD Gummy Bears** or **CBD oil**.

Since your **LAST** interview, have you used **CBD products**?

- Yes (1)
- No (2)
- I do not know (3)
- I do not wish to answer this question (4)

---

*Display This Question:*

*If The next questions are about cannabidiol (CBD) products such as CBD Gummy Bears or CBD oil. Since... = Yes*

X→

Q46 During the **past 30 days**, on how many days did you use **CBD products**?

▼ 0 days (1) ... I do not wish to answer this question (33)

X→

Q47 Since your **LAST** interview, have you used cocaine or crack cocaine?

- Yes (1)
  - No (2)
  - I do not know (3)
  - I do not wish to answer this question (4)
-

Display This Question:

If Since your LAST interview, have you used cocaine or crack cocaine? = Yes

X→

Q48 During the **past 30 days**, on how many days have you used **cocaine or crack cocaine**?

▼ 0 days (1) ... I do not wish to answer this question (33)

X→

Q49 Since your **LAST** interview, have you used heroin?

- Yes (1)
- No (2)
- I do not know (3)
- I do not wish to answer this question (4)

Display This Question:

If Since your LAST interview, have you used heroin? = Yes

X→

Q50 During the **past 30 days**, on how many days have you used **heroin**?

▼ 0 days (1) ... I do not wish to answer this question (33)

X→

Q51 Since your **LAST** interview, have you used **methadone or buprenorphine**?

- Yes (1)
- No (2)
- I do not know (3)
- I do not wish to answer this question (4)

---

*Display This Question:*

*If Since your LAST interview, have you used methadone or buprenorphine? = Yes*

X→

Q52 During the **past 30 days**, on how many days have you used **methadone or buprenorphine** ?

▼ 0 days (1) ... I do not wish to answer this question (33)

---

X→

Q53 Since your **LAST** interview, have you used **methamphetamine**?

- Yes (1)
- No (2)
- I do not know (3)
- I do not wish to answer this question (4)

---

*Display This Question:*

*If Since your LAST interview, have you used methamphetamine? = Yes*

X→

Q54 During the **past 30 days**, on how many days have you used **methamphetamine**?

▼ 0 days (1) ... I do not wish to answer this question (33)

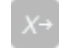

Q55 Since you **LAST** interview, have you used **benzodiazepines**?

- Yes (1)
- No (2)
- I do not know (3)
- I do not wish to answer this question (4)

---

*Display This Question:*

*If Since you LAST interview, have you used benzodiazepines? = Yes*

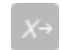

Q56 During the **past 30 days**, on how many days have you used **benzodiazepines**?

▼ 0 days (1) ... I do not wish to answer this question (33)

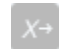

Q57 Since your **LAST** interview, have you used **any prescription pain reliever** in any way a doctor did not direct you to use it, including using it without a prescription of your own; using it in greater amounts, more often, or longer than you were told to take it; or using it in any other way a doctor did not direct you to use it such as to feel good or get high?

- Yes (1)
- No (2)
- I do not know (3)
- I do not wish to answer this question (4)

---

*Display This Question:*

*If Since your LAST interview, have you used any prescription pain reliever in any way a doctor did not direct you to use it such as to feel good or get high? n... = Yes*



Q58 During the **past 30 days**, on how many days have you used any prescription pain reliever in any way a doctor did not direct you to use it?

▼ 0 days (1) ... I do not wish to answer this question (33)

End of Block: Drug use

---

Start of Block: Risk Perception

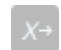

Q59

During your **LAST** interview, we asked about your opinion regarding the effects of using **marijuana**.

**What is your current opinion:** How much do women risk harming themselves physically and in other ways when they use marijuana once a month, **regardless of whether or not pregnant?**

- No risk (1)
  - Slight risk (2)
  - Moderate risk (3)
  - Great risk (4)
  - I do not know (5)
  - I do not wish to answer this question (6)
- 

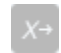

Q60

**What is your current opinion:** How much do women risk harming themselves physically and in other ways when they use marijuana once or twice a week, **regardless of whether or not pregnant?**

- No risk (1)
  - Slight risk (2)
  - Moderate risk (3)
  - Great risk (4)
  - I do not know (5)
  - I do not wish to answer this question (6)
-

X→

Q61 **What is your current opinion:** How much do **pregnant women** risk harming themselves physically and in other ways when they use marijuana once a month?

- No risk (1)
  - Slight risk (2)
  - Moderate risk (3)
  - Great risk (4)
  - I do not know (5)
  - I do not wish to answer this question (6)
- 

X→

Q62 **What is your current opinion:** How much do **pregnant women** risk harming themselves physically and in other ways when they use marijuana once or twice a week?

- No risk (1)
  - Slight risk (2)
  - Moderate risk (3)
  - Great risk (4)
  - I do not know (5)
  - I do not wish to answer this question (6)
- 

X→

**Q63 What is your current opinion:** Can marijuana use once a month during pregnancy **harm the baby?**

- No risk (1)
  - Slight risk (2)
  - Moderate risk (3)
  - Great risk (4)
  - I do not know (5)
  - I do not wish to answer this question (6)
- 



**Q64 What is your current opinion:** Can marijuana use once or twice a week during pregnancy **harm the baby?**

- No risk (1)
  - Slight risk (2)
  - Moderate risk (3)
  - Great risk (4)
  - I do not know (5)
  - I do not wish to answer this question (6)
- 

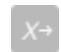

**Q65 What is your current opinion:** Can marijuana use while breastfeeding harm the infant?

- No risk (1)
- Slight risk (2)
- Moderate risk (3)
- Great risk (4)
- I do not know (5)
- I do not wish to answer this question (6)

---

Page Break

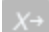

Q66 In the 3 months before you were pregnant, were you using marijuana for any reason?

- Yes (1)
- No (2)
- I do not know (3)
- I do not wish to answer this question (4)

End of Block: Risk Perception

---

Start of Block: Cannabis use during pregnancy

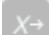

Q67 Since your **LAST** interview, did you use marijuana to **relieve stress or anxiety** during your pregnancy?

- Yes (1)
- No (2)
- I do not know (3)
- I do not wish to answer this question (4)

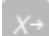

Q68 Since your **LAST** interview, did you use marijuana to **relieve symptoms of a chronic condition** during your pregnancy?

- Yes (1)
- No (2)
- I do not know (3)
- I do not wish to answer this question (4)

---

X→

Q69 Since your **LAST** interview, did you use marijuana to **relieve pain** during your pregnancy?

- Yes (1)
  - No (2)
  - I do not know (3)
  - I do not wish to answer this question (4)
- 

X→

Q70 Since your **LAST** interview, did you use marijuana **for fun or to relax** during your pregnancy?

- Yes (1)
  - No (2)
  - I do not know (3)
  - I do not wish to answer this question (4)
- 

X→

Q71 Since your **LAST** interview, is there **another reason** you used marijuana during your pregnancy?

- Yes. Please specify (1) \_\_\_\_\_
- No (2)
- I do not know (3)
- I do not wish to answer this question (4)

End of Block: Cannabis use during pregnancy

---
