# Supplementary material for: A feasibility study to assess the recruitment and retention of pregnant patients who regularly use cannabis
Source: Springer Nature journal article supplement (doi:10.1186/s13104-024-06826-4), 2024-06-25
Supplement: MOESM3 [file 13104_2024_6826_MOESM3_ESM.pdf]

# CLM-Maternal and Infant Health, Post-delivery Follow-up

---

Start of Block: Study ID

Q1 Please enter your study ID.

---

End of Block: Study ID

---

Start of Block: Drug use

Q2 Since your **LAST** interview, have you used or taken medication for which a **prescription** was needed?

Yes. Please list your medication below: (1)

---

No (2)

I do not know (3)

I do not wish to answer this question (4)

---

Q3 Since your **LAST** interview, have you used or taken an **over-the-counter medication**, for which a prescription was **NOT** needed?

Yes. Please list your medication below: (1)

---

No (2)

I do not know (3)

I do not wish to answer this question (4)

---

Page Break

---

*Display This Question:*

*If Since your LAST interview, have you used or taken medication for which a prescription was needed? = Yes. Please list your medication below:*

Q4 In the **past 30 days**, have you used or taken medication for which a **prescription** was needed?

Yes. Please list your medication below: (1)

---

No (2)

I do not know (3)

I do not wish to answer this question (4)

---

*Display This Question:*

*If Since your LAST interview, have you used or taken an over-the-counter medication, for which a pre... = Yes. Please list your medication below:*

Q5 In the **past 30 days**, have you used or taken **over-the-counter medication**, for which a prescription was **NOT** needed?

Yes. Please list your medication below: (1)

---

No (2)

I do not know (3)

I do not wish to answer this question (5)

---

Page Break

Q6 These questions are about the use of tobacco products. The first questions are about cigarettes only.

Since your **LAST** interview, have you smoked part or all of a **cigarette**?

- Yes (1)
- No (2)
- I do not know (3)
- I do not wish to answer this question (4)

---

*Display This Question:*

*If These questions are about the use of tobacco products. The first questions are about cigarettes o...  
= Yes*

Q7 During the past 30 days, on how many days did you **smoke part or all of a cigarette**?

▼ 0 days (1) ... I do not wish to answer this question (64)

*Skip To: Q9 If During the past 30 days, on how many days did you smoke part or all of a cigarette? = 0 days*

*Skip To: Q9 If During the past 30 days, on how many days did you smoke part or all of a cigarette? = I do not know*

*Skip To: Q9 If During the past 30 days, on how many days did you smoke part or all of a cigarette? = I do not wish to answer this question*

---

*Display This Question:*

*If These questions are about the use of tobacco products. The first questions are about cigarettes o...  
= Yes*

Q8 On the days you **smoked cigarettes** during the **past 30 days**, **how many** cigarettes did you smoke **per day**, on average?

- Less than one cigarette per day (1)
- 1 cigarette per day (2)
- 2 to 5 cigarettes per day (3)
- 6 to 15 cigarettes per day (about 1/2 pack) (4)
- 16 to 25 cigarettes per day (about 1 pack) (5)
- 26 to 35 cigarettes per day (about 1 1/2 packs) (6)
- More than 35 cigarettes per day (about 2 packs or more) (7)
- I do not know (9)
- I do not wish to answer this question (8)

---

Page Break

Q9 The following questions ask about using **smokeless tobacco**, such as snuff, dip, chewing tobacco, or snus.

Since your LAST interview, have you used “smokeless” tobacco, even once?

- Yes (1)
- No (4)
- I do not know (5)
- I do not wish to answer this question (6)

---

*Display This Question:*

*If The following questions ask about using smokeless tobacco, such as snuff, dip, chewing tobacco, o... = Yes*

Q10 During the past 30 days, on how many days did you use smokeless tobacco?

▼ 0 days (1) ... I do not wish to answer this question (64)

---

Page Break

Q11 The following questions ask about smoking other tobacco products such as pipes, cigars, little cigars or cigarillos, water pipes, hookahs, or e-cigarettes. Since your LAST interview, have you **ever smoked other tobacco products**, even once?

- Yes (1)
- No (2)
- I do not know (4)
- I do not wish to answer this question (5)

---

*Display This Question:*

*If The following questions ask about smoking other tobacco products such as pipes, cigars, little ci...  
= Yes*

Q12 During the past 30 days, on how many days did you **smoke** other tobacco products such as pipes, cigars, little cigars or cigarillos, water pipes, hookahs, or e-cigarettes?

▼ 0 days (1) ... I do not wish to answer this question (64)

---

Page Break

Q13 Since your **LAST** interview, have you had a drink of any type of **alcoholic beverage**? Please do not include times when you only had a sip or two from a drink.

- Yes (1)
- No (2)
- I do not know (3)
- I do not wish to answer this question (4)

---

*Display This Question:*

*If Since your LAST interview, have you had a drink of any type of alcoholic beverage? Please do not... = Yes*

Q14 During the **past 30 days**, on how many days did you **have a drink of any type of alcoholic beverage**?

▼ 0 days (77) ... I do not wish to answer this question (76)

---

Page Break

Q15

Since your **LAST** interview, have you used **marijuana**?

- Yes (1)
- No (2)
- I do not know (3)
- I do not wish to answer this question (4)

*Skip To: Q21 If Since your LAST interview, have you used marijuana? != Yes*

*Display This Question:*

*If Since your LAST interview, have you used marijuana? = Yes*

Q16 During the **past 30 days**, on how many **days** have you used **marijuana** ?

▼ 0 days (67) ... I do not wish to answer this question (66)

*Skip To: Q21 If During the past 30 days, on how many days have you used marijuana ? = 0 days*

*Display This Question:*

*If During the past 30 days, on how many days have you used marijuana ? = I do not know*

*Or During the past 30 days, on how many days have you used marijuana ? = I do not wish to answer this question*

Q17 During the **past 30 days**, what is your **best estimate** of the number of **days you used marijuana**?

- 0 days (11)
- 1 or 4 days (1)
- 5 to 10 days (4)
- 11 to 18 days (5)
- 19 to 29 days (6)
- All 30 days (8)
- I do not know (9)
- I do not wish to answer this question (10)

*Skip To: Q21 If During the past 30 days, what is your best estimate of the number of days you used marijuana? = 0 days*

*Skip To: Q21 If During the past 30 days, what is your best estimate of the number of days you used marijuana? = I do not know*

*Skip To: Q21 If During the past 30 days, what is your best estimate of the number of days you used marijuana? = I do not wish to answer this question*

---

Q18 During the days that you used **marijuana** in the past 30 days, **how many** would you usually use **in a day**?

- 1 per day (1)
  - 2 per day (4)
  - 3-5 per day (5)
  - Six or more per day (6)
  - I do not know (7)
  - I do not wish to answer this question (8)
-

Q19

Was any of your **marijuana** use in the **past 30 days** recommended by a doctor or other health care professional?

- Yes (1)
  - No (2)
  - I do not know (4)
  - I do not wish to answer this question (5)
- 

Q20 During the **past 30 days**, how did you use **marijuana**?

- Smoked a cigar with marijuana in it, such as a blunt (1)
  - Smoke it (such as a joint, bong, or pipe) (4)
  - Eat it (such as in brownies, cakes, cookies, or candy) (5)
  - Drink it (such as in tea, cola, or alcohol) (6)
  - Vaporize it (such as using a vape pen or e-cigarette-like vaporizer) (7)
  - Dab it (such as using butane hash oil, wax, or concentrates) (8)
  - Used it in some other way. Please specify. (9)
- 
- I do not know (10)
  - I do not wish to answer this question (11)
- 

Page Break

Q21 The next questions are about **cannabidiol (CBD) products** such as **CBD Gummy Bears** or **CBD oil**.

Since your **LAST** interview, have you used **CBD products**?

- Yes (1)
- No (4)
- I do not know (5)
- I do not wish to answer this question (6)

---

*Display This Question:*

*If The next questions are about cannabidiol (CBD) products such as CBD Gummy Bears or CBD oil.  
Since... = Yes*

Q22 During the **past 30 days**, on how many days did you use **CBD products**?

▼ 0 days (4) ... I do not wish to answer this question (35)

---

Page Break

Q23 Since your **LAST** interview, have you used cocaine or crack cocaine?

- Yes (1)
- No (2)
- I do not know (3)
- I do not wish to answer this question (4)

---

*Display This Question:*

*If Since your LAST interview, have you used cocaine or crack cocaine? = Yes*

Q24 During the **past 30 days**, on how many days have you used **cocaine or crack cocaine**?

▼ 0 days (1) ... I do not wish to answer this question (63)

---

Page Break

Q25 Since your **LAST** interview, have you used heroin?

- Yes (1)
- No (2)
- I do not know (3)
- I do not wish to answer this question (4)

---

*Display This Question:*

*If Since your LAST interview, have you used heroin? = Yes*

Q26 During the **past 30 days**, on how many days have you used **heroin**?

▼ 0 days (1) ... I do not wish to answer this question (63)

---

Page Break

Q27 Since your **LAST** interview, have you used **methadone or buprenorphine**?

- Yes (1)
- No (2)
- I do not know (3)
- I do not wish to answer this question (4)

---

*Display This Question:*

*If Since your LAST interview, have you used methadone or buprenorphine? = Yes*

Q28 During the **past 30 days**, on how many days have you used **methadone or buprenorphine** ?

▼ 0 days (1) ... I do not wish to answer this question (63)

---

Page Break

Q29 Since your **LAST** interview, have you used **methamphetamine**?

- Yes (1)
- No (2)
- I do not know (3)
- I do not wish to answer this question (4)

---

*Display This Question:*

*If Since your LAST interview, have you used methamphetamine? = Yes*

Q30 During the **past 30 days**, on how many days have you used methamphetamine?

▼ 0 days (1) ... I do not wish to answer this question (63)

---

Page Break

Q31 Since you **LAST** interview, have you used **benzodiazepines**?

- Yes (1)
- No (2)
- I do not know (3)
- I do not wish to answer this question (4)

---

*Display This Question:*

*If Since you LAST interview, have you used benzodiazepines? = Yes*

Q32 During the **past 30 days**, on how many days have you used benzodiazepines?

▼ 0 days (1) ... I do not wish to answer this question (63)

---

Page Break

Q33 Since your **LAST** interview, have you used **any prescription pain reliever** in any way a doctor **did not direct you to use it**, including using it **without a prescription of your own**; using it in **greater amounts, more often, or longer** than you were told to take it; or using it in any other way a doctor did not direct you to use it such as to **feel good or get high**?

- Yes (1)
- No (2)
- I do not know (3)
- I do not wish to answer this question (4)

---

*Display This Question:*

*If Since your LAST interview, have you used any prescription pain reliever in any way a doctor did n... = Yes*

Q34 During the **past 30 days**, on how many days have you used any prescription pain reliever in any way a doctor did not direct you to use it?

▼ 0 days (1) ... I do not wish to answer this question (63)

End of Block: Drug use

---

Start of Block: General Health & Pregnancy

Q35

Since your **LAST** interview, has a physician or healthcare professional told you that you have gestational diabetes, or pregnancy diabetes?

- Yes (1)
  - No (2)
  - I do not know (3)
  - I do not wish to answer this question (4)
-

Q36 Since your **LAST** interview, has a physician or healthcare professional told you that you have high blood pressure during pregnancy, or preeclampsia?

- Yes (1)
- No (2)
- I do not know (3)
- I do not wish to answer this question (4)

End of Block: General Health & Pregnancy

---

Start of Block: Risk Perception

Q37

During your **LAST** interview, we asked about your opinion regarding the effects of using **marijuana**.

**What is your current opinion:** How much do women risk **harming themselves** physically and in other ways when they use marijuana **ONCE A MONTH, regardless of whether or not pregnant?**

- No risk (1)
- Slight risk (7)
- Moderate risk (8)
- Great risk (9)
- I do not know (5)
- I do not wish to answer this question (6)

---

Page Break

Q38

**What is your current opinion:** How much do women risk **harming themselves** physically and in other ways when they use marijuana **ONCE OR TWICE A WEEK, regardless of whether or not pregnant?**

- No risk (1)
- Slight risk (7)
- Moderate risk (8)
- Great risk (9)
- I do not know (5)
- I do not wish to answer this question (6)

---

Page Break

**Q39 What is your current opinion:** How much do **pregnant women** risk **harming themselves** physically and in other ways when they use marijuana **ONCE A MONTH**?

- No risk (1)
- Slight risk (7)
- Moderate risk (8)
- Great risk (9)
- I do not know (10)
- I do not wish to answer this question (11)

---

Page Break

**Q40 What is your current opinion:** How much do **pregnant women** risk **harming themselves** physically and in other ways when they use marijuana **ONCE OR TWICE A WEEK?**

- No risk (1)
- Slight risk (7)
- Moderate risk (8)
- Great risk (9)
- I do not know (10)
- I do not wish to answer this question (11)

---

Page Break

**Q41 What is your current opinion:** Can marijuana use **ONCE A MONTH** during pregnancy harm the baby?

- No risk (1)
- Slight risk (8)
- Moderate risk (9)
- Great risk (10)
- I do not know (11)
- I do not wish to answer this question (12)

---

Page Break

Q42 **What is your current opinion:** Can marijuana use **ONCE OR TWICE A WEEK** during pregnancy **harm the baby?**

- No risk (1)
- Slight risk (8)
- Moderate risk (9)
- Great risk (10)
- I do not know (11)
- I do not wish to answer this question (12)

---

Page Break

**Q43 What is your current opinion:** Can marijuana use while breastfeeding harm the infant?

- No risk (1)
- Slight risk (8)
- Moderate risk (9)
- Great risk (10)
- I do not know (11)
- I do not wish to answer this question (12)

**End of Block: Risk Perception**

---

**Start of Block: Delivery**

**Q44**

The following questions are about your most recent pregnancy.

When did you give birth?

- I gave birth this week (1)
  - I gave birth 1 week ago (2)
  - I gave birth 2 weeks ago (3)
  - I gave birth 3 weeks ago (4)
  - I gave birth 4 weeks ago (5)
  - Other. Please specify (9)
- 

-----  
Page Break

---



Q45

Please recall that you were asked to record the following:

**Gestational age** is measured from the first day of your last menstrual period to determine the age (in weeks) of your baby.

At what **gestational age** did you give birth?

- Less than 28 weeks (1)
- 28 weeks (11)
- 29 weeks (12)
- 30 weeks (13)
- 31 weeks (14)
- 32 weeks (15)
- 33 weeks (16)
- 34 weeks (17)
- 35 weeks (18)
- 36 weeks (2)
- 37 weeks (3)
- 38 weeks (4)
- 39 weeks (5)
- 40 weeks (6)
- 41 weeks (7)
- 42 weeks or more (8)
- I do not know (9)
- I do not wish to answer this question (19)

---

Page Break

---

Q46 Please recall that you were asked to record the following:

By the end of your most recent pregnancy, how much did **YOU** weigh?

- Weight in pounds: (1) \_\_\_\_\_
  - Weight in Kilograms: (2) \_\_\_\_\_
  - I do not know (3)
  - I do not wish to answer this question (4)
- 

Q47 Was an **infection(s)** present during you most recent pregnancy?

- Yes, Chlamydia was present (1)
  - Yes, Gonorrhea was present (3)
  - Yes, Hepatitis B was present (4)
  - Yes, Hepatitis C was present (5)
  - Yes, Syphilis was present (6)
  - Other. Please specify: (7) \_\_\_\_\_
- 
- No infection was present (9)
  - I do not know (10)
  - I do not wish to answer this question (11)
-

Q48 Did you experience any **complications** during your most recent **pregnancy**?

- Yes. Please specify (1) \_\_\_\_\_
- No (2)
- I do not know (3)
- I do not wish to answer this question (4)

---

*Display This Question:*

*If Did you experience any complications during your most recent pregnancy? = Yes. Please specify*

Q49 Were **YOU** admitted to the **intensive care unit (ICU)** as a result of **complications** during your most recent **pregnancy**?

- Yes (1)
- No (2)
- I do not know (3)
- I do not wish to answer this question (4)

---

*Display This Question:*

*If Were YOU admitted to the intensive care unit (ICU) as a result of complications during your most... = Yes*

Q50 How many **days** did you stay in the **ICU** as a result of **complications** during your most recent **pregnancy**?

- Less than 1 day (1)
- Length of your ICU stay in DAYS: (2)  
\_\_\_\_\_
- I do not know (3)
- I do not wish to answer this question (4)

---

Page Break

---

Q51 Did you experience any **complications** at the time of **delivery**?

- Yes. Please specify (1) \_\_\_\_\_
- No (2)
- I do not know (3)
- I do not wish to answer this question (4)

---

*Display This Question:*

*If Did you experience any complications at the time of delivery? = Yes. Please specify*

Q52 Were **YOU** admitted to the **intensive care unit (ICU)** as a result of **complications** at the time of **delivery**?

- Yes (1)
- No (2)
- I do not know (3)
- I do not wish to answer this question (4)

---

*Display This Question:*

*If Were YOU admitted to the intensive care unit (ICU) as a result of complications at the time of de...  
= Yes*

Q53 How many **days** did you stay in the intensive care unit (ICU) as a result of complications at the time of delivery?

Less than 1 day (1)

Length of your ICU stay in DAYS: (2)

---

I do not know (3)

I do not wish to answer this question (4)

---

Page Break

Q54 Where did you give birth?

In a hospital or birth center (1)

At home (2)

Other. Please specify (3)

---

I do not wish to answer this question (4)

---

Q55 How long were you in labor?

Less than 3 hours (1)

3-11 hours (2)

12-19 hours (3)

Greater than 20 hours (4)

I do not know (5)

I do not wish to answer this question (6)

---

Page Break

---

Q56 I had a .....

- Vaginal delivery (1)
  - Cesarean section (C-section), a surgical procedure in which incisions are made through the abdomen and uterus to deliver a baby. (2)
  - Other. Please specify: (5)  
\_\_\_\_\_
  - I do not wish to answer this question (4)
- 

Q57

Please recall that you were asked to record the following:

Labor induction is the stimulation of uterine contractions during pregnancy before labor begins on its own.

Was your **labor induced**?

- Yes (1)
  - No (2)
  - I do not know (3)
  - I do not wish to answer this question (4)
- 

*Display This Question:*

*If I had a ..... = Cesarean section (C-section), a surgical procedure in which incisions are made through the abdomen and uterus to deliver a baby.*

Q58 My Cesarean section (C-section) was .....

- Planned (1)
  - Emergency (2)
  - Other. Please specify: (3)
- 

- I do not know (4)
  - I do not wish to answer this question (5)
- 

*Display This Question:*

*If Where did you give birth? = In a hospital or birth center*

Q59 How many **days** did **YOU stay in the hospital** after you delivered your baby?

- Less than 1 day (2)
  - Length of your hospital stay in DAYS: (3)
- 
- I do not know (4)
  - I do not wish to answer this question (5)
- 

Page Break

---

Q61 **How many** babies did you deliver?

- I gave birth to 1 new baby (singleton) (1)
  - I gave birth to 2 new babies (twins) (2)
  - I gave birth to 3 or more new babies (3)
  - I do not know (4)
  - I do not wish to answer this question (5)
- 

*Display This Question:*

*If How many babies did you deliver? = I gave birth to 1 new baby (singleton)*

Q60 Has your delivery resulted in a **live** birth?

- Yes (1)
  - No (2)
- 

Page Break

---

*Display This Question:*

*If How many babies did you deliver? = I gave birth to 1 new baby (singleton)*

Q62 What is the **sex** of your new baby?

Male (1)

Female (2)

---

Page Break

Display This Question:

If How many babies did you deliver? = I gave birth to 1 new baby (singleton)

Q63 Please recall that you were asked to record the following:

When your baby was born, what was his/her **birthweight**?

Birthweight in pounds (e.g., 7 lbs. 6 oz.): (1)

---

Birthweight in grams (e.g., 3345 g): (2)

---

I do not know (3)

I do not wish to answer this question (4)

---

Page Break

*Display This Question:*

*If How many babies did you deliver? = I gave birth to 1 new baby (singleton)*

Q64

The **neonatal intensive care unit**, or **NICU**, is a nursery in a hospital that provides care to sick or premature newborns following birth.

Was your new baby **admitted to the NICU** following birth?

- Yes (1)
- No (2)
- I do not know (3)
- I do not wish to answer this question (4)

---

*Display This Question:*

*If The neonatal intensive care unit, or NICU, is a nursery in a hospital that provides care to sick... = Yes*

Q65 How many **days** did your baby stay in the **neonatal intensive care unit (NICU)**?

- Less than 1 day (4)
- Length of newborn's hospital stay in DAYS: (1)  
\_\_\_\_\_
- I do not know (2)
- I do not wish to answer this question (3)

---

Page Break

Display This Question:

If How many babies did you deliver? = I gave birth to 1 new baby (singleton)

Q66

Please recall that you were asked to record the following:

An **Apgar score** provides a standardized assessment for infants after delivery. It measures five components: the infant's 1) color, 2) heart rate, 3) reflexes, 4) muscle tone, and 5) respiration.

The **Apgar score** is measured **1 minute** after birth and ranges from 0 to 10.

What was your infant's **1-MINUTE Apgar score**?

▼ 0 (1) ... I do not wish to answer this question (13)

---

Page Break

Display This Question:

If How many babies did you deliver? = I gave birth to 1 new baby (singleton)

Q67

Please recall that you were asked to record the following:

An **Apgar score** provides a standardized assessment for infants after delivery. It measures five components: the infant's 1) color, 2) heart rate, 3) reflexes, 4) muscle tone, and 5) respiration.

The **Apgar score** is also measured **5 minutes** after birth and ranges from 0 to 10.

What was your infant's **5-MINUTE Apgar score**?

▼ 0 (1) ... I do not wish to answer this question (13)

---

Page Break

*Display This Question:*

*If How many babies did you deliver? = I gave birth to 2 new babies (twins)*

*Or How many babies did you deliver? = I gave birth to 3 or more new babies*

Q128 Has your delivery resulted in a live birth of baby #1?

Yes (1)

No (2)

---

*Display This Question:*

*If How many babies did you deliver? = I gave birth to 2 new babies (twins)*

*Or How many babies did you deliver? = I gave birth to 3 or more new babies*

Q68 What is the **sex** of baby #1?

Male (1)

Female (2)

---

Page Break

Display This Question:

If How many babies did you deliver? = I gave birth to 2 new babies (twins)

Or How many babies did you deliver? = I gave birth to 3 or more new babies

Q69 Please recall that you were asked to record the following:

When baby #1 was born, what was his/her **birthweight**?

Birthweight in pounds (e.g., 7 lbs. 6 oz.): (1)

---

Birthweight in grams (e.g., 3345 g): (2)

---

I do not know (3)

I do not wish to answer this question (4)

---

Page Break

*Display This Question:*

*If How many babies did you deliver? = I gave birth to 2 new babies (twins)*

*Or How many babies did you deliver? = I gave birth to 3 or more new babies*

Q70

The **neonatal intensive care unit**, or **NICU**, is a nursery in a hospital that provides care to sick or premature newborns following birth.

Was baby #1 **admitted to the NICU** following birth?

- Yes (1)
- No (2)
- I do not know (3)
- I do not wish to answer this question (4)

---

*Display This Question:*

*If The neonatal intensive care unit, or NICU, is a nursery in a hospital that provides care to sick... = Yes*

Q71 How many **days** did baby #1 stay in the **neonatal intensive care unit (NICU)**?

- Less than 1 day (4)
- Length of newborn's hospital stay in DAYS: (1)  
\_\_\_\_\_
- I do not know (2)
- I do not wish to answer this question (3)

---

Page Break

Display This Question:

*If How many babies did you deliver? = I gave birth to 2 new babies (twins)*

*Or How many babies did you deliver? = I gave birth to 3 or more new babies*

Q72

Please recall that you were asked to record the following:

An **Apgar score** provides a standardized assessment for infants after delivery. It measures five components: the infant's 1) color, 2) heart rate, 3) reflexes, 4) muscle tone, and 5) respiration.

The **Apgar score** is measured **1 minute** after birth and ranges from 0 to 10.

What was baby #1's **1-MINUTE Apgar score**?

▼ 0 (1) ... I do not wish to answer this question (13)

---

Page Break

Display This Question:

*If How many babies did you deliver? = I gave birth to 2 new babies (twins)*

*Or How many babies did you deliver? = I gave birth to 3 or more new babies*

Q73

Please recall that you were asked to record the following:

An **Apgar score** provides a standardized assessment for infants after delivery. It measures five components: the infant's 1) color, 2) heart rate, 3) reflexes, 4) muscle tone, and 5) respiration.

The **Apgar score** is also measured **5 minutes** after birth and ranges from 0 to 10.

What was baby #1's **5-MINUTE Apgar score**?

▼ 0 (1) ... I do not wish to answer this question (13)

---

Page Break

*Display This Question:*

*If How many babies did you deliver? = I gave birth to 2 new babies (twins)*

*Or How many babies did you deliver? = I gave birth to 3 or more new babies*

Q129 Has your delivery resulted in a live birth of baby #2?

Yes (1)

No (2)

---

*Display This Question:*

*If How many babies did you deliver? = I gave birth to 2 new babies (twins)*

*Or How many babies did you deliver? = I gave birth to 3 or more new babies*

Q74 What is the **sex** of baby #2?

Male (1)

Female (2)

---

Page Break

Display This Question:

If How many babies did you deliver? = I gave birth to 2 new babies (twins)

Or How many babies did you deliver? = I gave birth to 3 or more new babies

Q75 Please recall that you were asked to record the following:

When baby #2 was born, what was his/her **birthweight**?

Birthweight in pounds (e.g., 7 lbs. 6 oz.): (1)

---

Birthweight in grams (e.g., 3345 g): (2)

---

I do not know (3)

I do not wish to answer this question (4)

---

Page Break

*Display This Question:*

*If How many babies did you deliver? = I gave birth to 2 new babies (twins)*

*Or How many babies did you deliver? = I gave birth to 3 or more new babies*

Q76

The **neonatal intensive care unit**, or **NICU**, is a nursery in a hospital that provides care to sick or premature newborns following birth.

Was baby #2 **admitted to the NICU** following birth?

- Yes (1)
- No (2)
- I do not know (3)
- I do not wish to answer this question (4)

---

*Display This Question:*

*If The neonatal intensive care unit, or NICU, is a nursery in a hospital that provides care to sick... = Yes*

Q77 How many **days** did baby #2 stay in the **neonatal intensive care unit (NICU)**?

- Less than 1 day (4)
- Length of newborn's hospital stay in DAYS: (1)  
\_\_\_\_\_
- I do not know (2)
- I do not wish to answer this question (3)

---

Page Break

Display This Question:

*If How many babies did you deliver? = I gave birth to 2 new babies (twins)*

*Or How many babies did you deliver? = I gave birth to 3 or more new babies*

Q78

Please recall that you were asked to record the following:

An **Apgar score** provides a standardized assessment for infants after delivery. It measures five components: the infant's 1) color, 2) heart rate, 3) reflexes, 4) muscle tone, and 5) respiration.

The **Apgar score** is measured **1 minute** after birth and ranges from 0 to 10.

What was baby #2's **1-MINUTE Apgar score**?

▼ 0 (1) ... I do not wish to answer this question (13)

---

Page Break

Display This Question:

*If How many babies did you deliver? = I gave birth to 2 new babies (twins)*

*Or How many babies did you deliver? = I gave birth to 3 or more new babies*

Q79

Please recall that you were asked to record the following:

An **Apgar score** provides a standardized assessment for infants after delivery. It measures five components: the infant's 1) color, 2) heart rate, 3) reflexes, 4) muscle tone, and 5) respiration.

The **Apgar score** is also measured **5 minutes** after birth and ranges from 0 to 10.

What was baby #2's **5-MINUTE Apgar score**?

▼ 0 (1) ... I do not wish to answer this question (13)

---

Page Break

*Display This Question:*

*If How many babies did you deliver? = I gave birth to 3 or more new babies*

Q130 Has your delivery resulted in a live birth of baby #3?

Yes (1)

No (2)

---

*Display This Question:*

*If How many babies did you deliver? = I gave birth to 3 or more new babies*

Q80 What is the **sex** of baby #3?

Male (1)

Female (2)

---

Page Break

Display This Question:

If How many babies did you deliver? = I gave birth to 3 or more new babies

Q81 Please recall that you were asked to record the following:

When baby #3 was born, what was his/her **birthweight**?

Birthweight in pounds (e.g., 7 lbs. 6 oz.): (1)

---

Birthweight in grams (e.g., 3345 g): (2)

---

I do not know (3)

I do not wish to answer this question (4)

---

Page Break

*Display This Question:*

*If How many babies did you deliver? = I gave birth to 3 or more new babies*

Q82

The **neonatal intensive care unit**, or **NICU**, is a nursery in a hospital that provides care to sick or premature newborns following birth.

Was baby #3 **admitted to the NICU** following birth?

- Yes (1)
- No (2)
- I do not know (3)
- I do not wish to answer this question (4)

---

*Display This Question:*

*If The neonatal intensive care unit, or NICU, is a nursery in a hospital that provides care to sick o... = Yes*

Q83 How many **days** did baby #3 stay in the **neonatal intensive care unit (NICU)**?

- Less than 1 day (4)
- Length of newborn's hospital stay in DAYS: (1)  
\_\_\_\_\_
- I do not know (2)
- I do not wish to answer this question (3)

---

Page Break

Display This Question:

If How many babies did you deliver? = I gave birth to 3 or more new babies

Q84

Please recall that you were asked to record the following:

An **Apgar score** provides a standardized assessment for infants after delivery. It measures five components: the infant's 1) color, 2) heart rate, 3) reflexes, 4) muscle tone, and 5) respiration.

The **Apgar score** is measured **1 minute** after birth and ranges from 0 to 10.

What was baby #3's **1-MINUTE Apgar score**?

▼ 0 (1) ... I do not wish to answer this question (13)

---

Page Break

Display This Question:

If How many babies did you deliver? = I gave birth to 3 or more new babies

Q85

Please recall that you were asked to record the following:

An **Apgar score** provides a standardized assessment for infants after delivery. It measures five components: the infant's 1) color, 2) heart rate, 3) reflexes, 4) muscle tone, and 5) respiration.

The **Apgar score** is also measured **5 minutes** after birth and ranges from 0 to 10.

What was baby #3's **5-MINUTE Apgar score**?

▼ 0 (1) ... I do not wish to answer this question (13)

---

Page Break

*Display This Question:*

*If Has your delivery resulted in a live birth? = Yes*

Q86 Is your baby living with you now?

- Yes (1)
  - No (2)
  - I do not wish to answer this question (3)
- 

*Display This Question:*

*If Is your baby living with you now? = Yes*

Q87 Did you ever breastfeed or pump breast milk to feed your new baby, even for a short period of time?

- Yes (1)
  - No (2)
  - I do not wish to answer this question (3)
- 

*Display This Question:*

*If Did you ever breastfeed or pump breast milk to feed your new baby, even for a short period of time? = Yes*

Q88 Are you currently breastfeeding or feeding pumped milk to your new baby?

- Yes (1)
- No (2)
- I do not wish to answer this question (4)

**End of Block: Delivery**

---
